# Supplementary material for: Diffusion Weighted Imaging of the spinal cord in children after a prenatal myelomeningocele repair
Source: Research Square preprint supplement (doi:10.21203/rs.3.rs-7495159/v1), 2025-09-09

**Fetoscopic repair technique**

All fetal repairs were performed under maternal general anesthesia with supplemental administration of fetal intramuscular anesthesia to prevent the stress response and movement associated with a noxious stimulus to a fetus. Adequate uterine tocolysis was achieved using a combination of volatile anesthesia, magnesium sulfate, and indomethacin. A laparotomy was performed, and the uterus exteriorized. Ultrasound was used to position the fetus and identify the placenta before entering the uterus. For fetoscopic cases, an ultrasound guided modified Seldinger technique was used to place the first 12 French port. The port was secured to the uterine wall, and tack-up sutures were placed to anchor the membranes. Amniotic fluid was removed. Humidified carbon dioxide gas was used to insufflate the uterus to a pressure between 5-8 mmHg. A channel endoscope was then inserted to inspect the MMC lesion. Next, a second 12 French port was placed using endoscopic guidance approximately 4-6 cm from the first port and away from the placenta.

The fetoscopic closure technique varied over time. In the first 33 cases, we employed a two-step, single-layered closure technique (1). In the first step, the placode was untethered from the skin using sharp dissection; the placode was never closed or tubularized. In the second step, a unified layer of skin and dura were brought together using a vertical mattress or a running stitch. No patches were used. Due to high rates of cerebrospinal fluid leak at birth and tethered cord syndrome at an early age, we changed to a multi-layered approach with an in-lay bovine collagen patch placed over the untethered placode, followed by closure of dura with myofascial flaps, followed by skin closure (2) In cases where we could not bring the skin edges together, we created bi-pedicular advancement flaps with bovie cautery. If, at any point during the MMC repair, we determined it was not technically possible to get a water-tight closure, we converted to hysterotomy to complete the surgery.

1. Belfort MA, Whitehead WE, Shamshirsaz AA, et al. Comparison of two fetoscopic open neural tube defect (ONTD) repair techniques: Single-layer vs three-layer closure. Ultrasound in obstetrics & gynecology : the official journal of the International Society of Ultrasound in Obstetrics and Gynecology. Nov 11 201

2.Belfort MA, Whitehead WE, Shamshirsaz AA, et al. Fetoscopic Open Neural Tube Defect Repair: Development and Refinement of a Two-Port, Carbon Dioxide Insufflation Technique. Obstetrics and gynecology. Apr 2017;129(4):734-743.

**Supplementary Table 1.** Prenatal assessment of the motor function according to the lower extremity movements34. The best level was used to characterize the level of lesion.

| **Metameric Level** | **Function** |
| --- | --- |
| L1-L2 | Hip Flexion/adduction |
| L3 | Knee extension |
| L4-L5 | dorsiflexion of the ankle |
| S1 | Plantar flexion of ankle (gas pedal) |

**Supplementary Figure 1.** Placement of Region-of-interest (ROI) in case with hydromyelia at the level of the lesion. Cerebrospinal fluid was excluded from ROI.


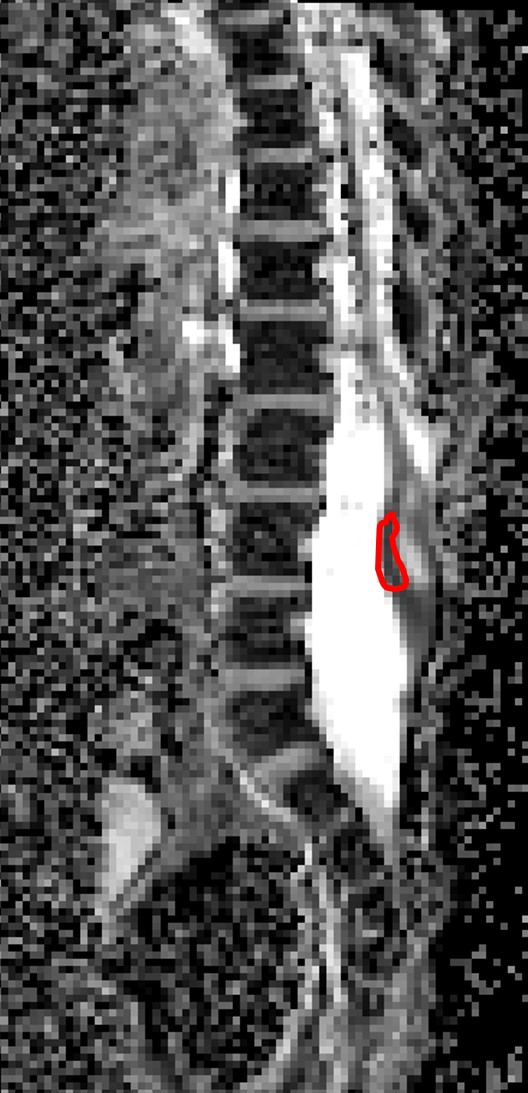

Supplement: Supplementary file 1 [file 8fb726b61f46640d50b72d00.docx]
